# Supplementary material for: The Pomegranate Deciduous Trait Is Genetically Controlled by a PgPolyQ-MADS Gene
Source: Frontiers journal article supplement (doi:10.3389/fpls.2022.870207), 2022-04-29
Supplement: Image_1.pdf [file Image_1.pdf]

## Supplementary Figures

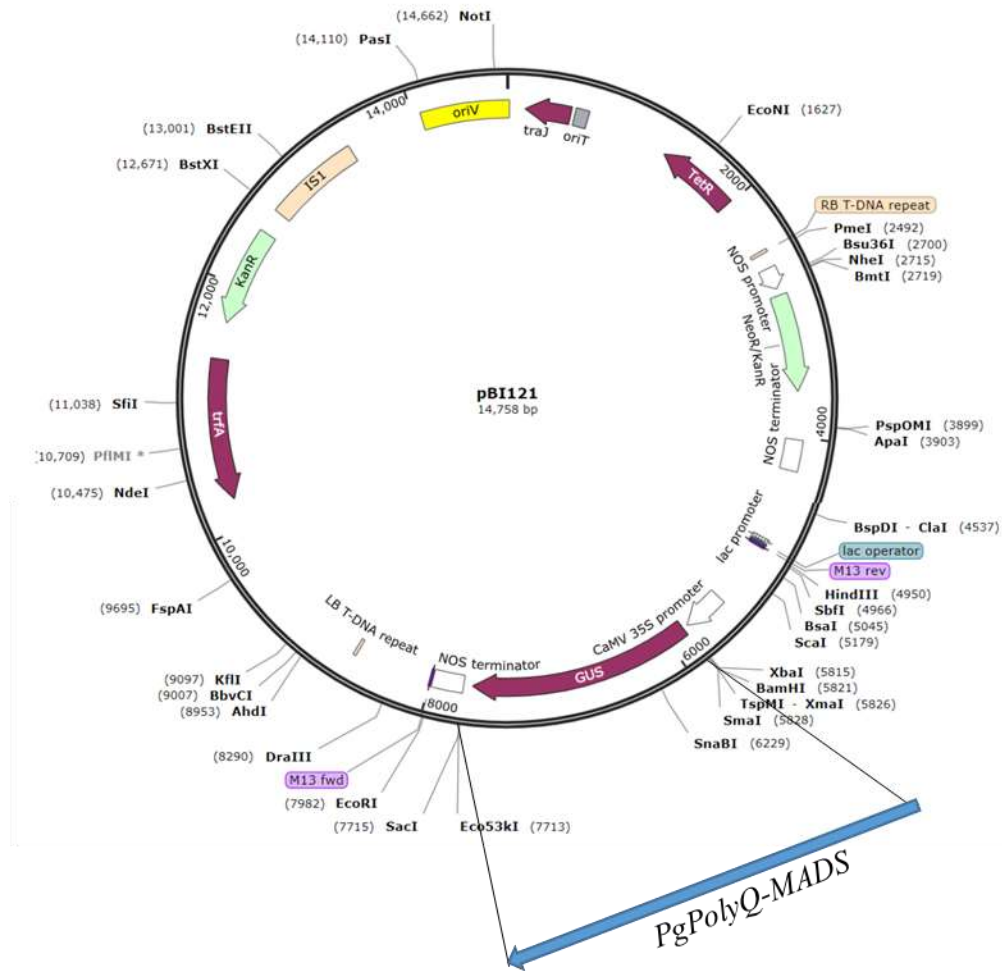

Supplementary Figure 1. The vector PBI121-5610 express the *PgPolyQ-MADS* gene. The *PgPolyQ-MADS* gene was cloned into the expression vector PBI121 (GenBank entry AF485783) under the control of the 35S promoter, instead of GUS. The plasmid was designated PBI121-5610. PBI121 vector graphic was downloaded from [https://www.snapgene.com/resources/plasmid-files/?set=plant\\_vectors&plasmid=pBI121](https://www.snapgene.com/resources/plasmid-files/?set=plant_vectors&plasmid=pBI121) website.
